# Supplementary material for: The Roles of Calmodulin and CaMKII in Cx36 Plasticity
Source: MDPI journal article supplement (doi:10.3390/ijms22094473), 2021-04-25
Supplement: s1 [file s1]

**Supplementary Figure S1: Top)** Cladogram of Cx35/36 protein sequences representing mammalian and lower vertebrates used as animal models in neurobiology research. **Bottom)** Multiple sequence alignment using Clustal Omega with default settings at the European Bioinformatics Institute (EBI). Homology regions for *CaM/CaMKII*-binding and S110/T111 phosphorylation in red.

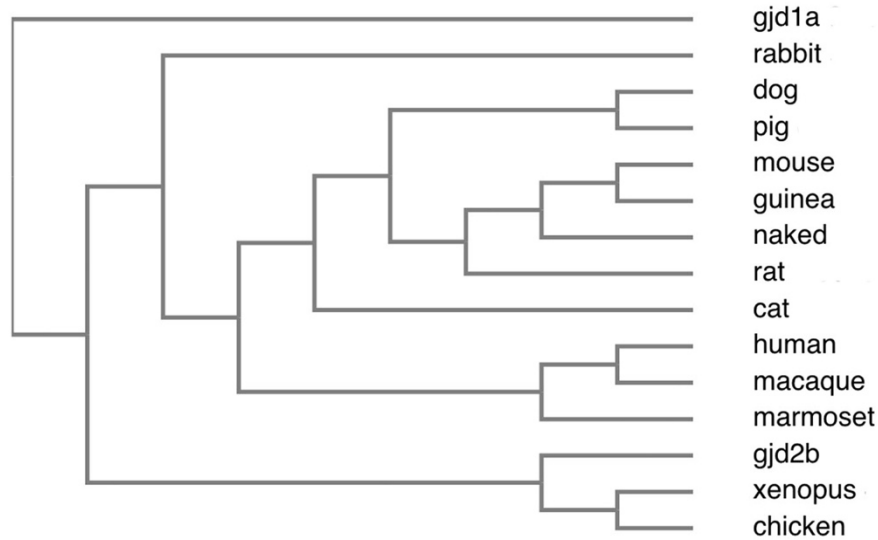

|          |                                                              |    |
|----------|--------------------------------------------------------------|----|
| gjd1a    | MGEWTILERLLEAAVQQHSTMIGRILLTVVVFIRILIVGIVGEKVYEDEQIMFICNTLQP | 60 |
| rabbit   | MGEWTILERLLEAAVQQHSTMIGRILLTVVVFIRILIVAIVGETVYDDEQTMFVCNTLQP | 60 |
| dog      | -----ERLLEAAVQQHSTMIGRILLTVVVFIRILIVAIVGETVYDDEQTMFVCNTLQP   | 53 |
| mouse    | MGEWTILERLLEAAVQQHSTMIGRILLTVVVFIRILIVAIVGETVYDDEQTMFVCNTLQP | 60 |
| rat      | MGEWTILERLLEAAVQQHSTMIGRILLTVVVFIRILIVAIVGETVYDDEQTMFVCNTLQP | 60 |
| human    | MGEWTILERLLEAAVQQHSTMIGRILLTVVVFIRILIVAIVGETVYDDEQTMFVCNTLQP | 60 |
| macaque  | MGEWTILERLLEAAVQQHSTMIGRILLTVVVFIRILIVAIVGETVYDDEQTMFVCNTLQP | 60 |
| marmoset | MGEWTILERLLEAAVQQHSTMIGRILLTVVVFIRILIVAIVGETVYDDEQTMFVCNTLQP | 60 |
| cat      | MGEWTILERLLEAAVQQHSTMIGRILLTVVVFIRILIVAIVGETVYDDEQTMFVCNTLQP | 60 |
| pig      | MGEWTILERLLEAAVQQHSTMIGRILLTVVVFIRILIVAIVGETVYDDEQTMFVCNTLQP | 60 |
| guinea   | MGEWTILERLLEAAVQQHSTMIGRILLTVVVFIRILIVAIVGETVYDDEQTMFVCNTLQP | 60 |
| naked    | MGEWTILERLLEAAVQQHSTMIGRILLTVVVFIRILIVAIVGETVYDDEQTMFVCNTLQP | 60 |
| gjd2b    | MGEWTILERLLEAAVQQHSTMIGRILLTVVVFIRILIVAIVGETVYDDEQSMFVCNTLQP | 60 |
| xenopus  | MGEWTILERLLEAAVQQHSTMIGRILLTVVVFIRILIVAIVGETVYDDEQTMFVCNTLQP | 60 |
| chicken  | MGEWTILERLLEAAVQQHSTMIGRILLTVVVFIRILIVAIVGETVYDDEQTMFVCNTLQP | 60 |
|          | *****.***.*** **.*                                           |    |

#### S110/T111

|          |                                                              |     |
|----------|--------------------------------------------------------------|-----|
| gjd1a    | GCNQACYDKAFPISHIRYWVFQIILVCTPSLCFITYSVHQSAKHKDQRYTLLHGPy---- | 116 |
| rabbit   | GCNQACYDRAFPISHIRYWVFQIIMVCTPSLCFITYSVHQSAQRERRYSTVFLSLDRDP  | 120 |
| dog      | GCNQACYDRAFPISHIRYWVFQIIMVCTPSLCFITYSVHQSAQRERRYSTVFLALDRDP  | 113 |
| mouse    | GCNQACYDRAFPISHIRYWVFQIIMVCTPSLCFITYSVHQSAQRERRYSTVFLALDRDP  | 120 |
| rat      | GCNQACYDRAFPISHIRYWVFQIIMVCTPSLCFITYSVHQSAQRERRYSTVFLALDRDP  | 120 |
| human    | GCNQACYDRAFPISHIRYWVFQIIMVCTPSLCFITYSVHQSAQRERRYSTVFLALDRDP  | 120 |
| macaque  | GCNQACYDRAFPISHIRYWVFQIIMVCTPSLCFITYSVHQSAQRERRYSTVFLALDRDP  | 120 |
| marmoset | GCNQACYDRAFPISHIRYWVFQIIMVCTPSLCFITYSVHQSAQRERRYSTVFLALDRDP  | 120 |
| cat      | GCNQACYDRAFPISHIRYWVFQIIMVCTPSLCFITYSVHQSAQRERRYSTVFLTLDRDP  | 120 |

[illegible]

|          |                                                             |     |
|----------|-------------------------------------------------------------|-----|
| gjdl     | -----IDHGHG-----PSRKL--RNINGILVHPE---SKDDRECLDLKDIPNIPAG    | 157 |
| rabbit   | PDSMGGPGGTGGGGSGGKREDKKLQNAIVNGVLQNPENPSKETEPDCLEVKELTPHPSG | 180 |
| dog      | PESMGGPGGTGSGASGSSKREDKKLQNAIVNGVLQNTENTSKEVEPCLEVKELTPHPSG | 173 |
| mouse    | AESIGPGGTGGGGSGGSKREDKKLQNAIVNGVLQNTETTSKETEPDCLEVKELTPHPSG | 180 |
| rat      | AESIGPGGTGGGGSGGSKREDKKLQNAIVNGVLQNTETTSKETEPDCLEVKELAPHPSG | 180 |
| human    | PESIGPGGTGGGGSGGKREDKKLQNAIVNGVLQNTENTSKETEPDCLEVKELTPHPSG  | 180 |
| macaque  | PESIGPGGTGGGGSGGKREDKKLQNAIVNGVLQNTENTSKETEPDCLEVKELTPHPSG  | 180 |
| marmoset | PESIGPGGATGGGGSGGKREDKKLQNAIVNGVLQNTENTSKETEPDCLEVKELTPHPSG | 180 |
| cat      | PESMGGPGGTGGGGSGGKRDDKKLQNAIVNGVLQNTENTSKETEPDCLEVKELTPHPSG | 180 |
| pig      | PESMGGPGGTGGGGSGGKREDKKLQNAIVNGVLQNTENTSKETEPDCLEVKELTPHPSG | 180 |
| guinea   | PESMGGPGGTGGGGSGGKREDKKLQNAIVNGVLQNTENTSKETEPDCLEVKELTPHPSG | 180 |
| naked    | PESMGGPGGTGGSSGGGKREDKKLQNAIVNGVLQNTENTSKETEPDCLEVKELTPHPSG | 180 |
| gj2b     | DTMR-----RDSKKIKNTIVNGVLQNTENSTKESEPCLEVKEIPN---S           | 163 |
| xenopus  | DTVK-----REDSKKIKNTLVNGVLQNTENSTKEAEPDCLEIKEIPN---P         | 163 |
| chicken  | DSMK-----REDSKKIKNTIVNGVLQNTENSTKEAEPDCLEVKEIPN---P         | 163 |

**T-site homology region**

|          |                                                                |     |
|----------|----------------------------------------------------------------|-----|
| gjdl     | VITYSKSAKIRQQEGISRFYIIQVVFRNVALEIGFLAGQYFLYGFNVPAMFECDRYPCKVEV | 217 |
| rabbit   | MRTAAKSLLRRQEGISRFYIIQVVFRNALEIGFLVGQYFLYGFSVPGLYEENRYPCIKEV   | 240 |
| dog      | LRTAARSKLRRQEGISRFYIIQVVFRNALEIGFLVGQYFLYGFSVPGLYECDRYPCKIEV   | 233 |
| mouse    | LRTAARSKLRRQEGISRFYIIQVVFRNALEIGFLVGQYFLYGFSVPGLYEENRYPCIKEV   | 240 |
| rat      | LRTAARSKLRRQEGISRFYIIQVVFRNALEIGFLVGQYFLYGFSVPGLYEENRYPCIKEV   | 240 |
| human    | LRTASKSLRRQEGISRFYIIQVVFRNALEIGFLVGQYFLYGFSVPGLYEENRYPCIKEV    | 240 |
| macaque  | LRTASKSLRRQEGISRFYIIQVVFRNALEIGFLVGQYFLYGFSVPGLYEENRYPCIKEV    | 240 |
| marmoset | LRTASKSLRRQEGISRFYIIQVVFRNALEIGFLVGQYFLYGFSVPGLYEENRYPCIKEV    | 240 |
| cat      | LRTAARSKLRRQEGISRFYIIQVVFRNALEIGFLVGQYFLYGFSVPGLYECDRYPCKIEV   | 240 |
| pig      | LRTAARSKLRRQEGISRFYIIQVVFRNALEIGFLVGQYFLYGFSVPGLYECDRYPCKIEV   | 240 |
| guinea   | LRTAARSKLRRQEGISRFYIIQVVFRNALEIGFLVGQYFLYGFSVPGLYEENRYPCIKEV   | 240 |
| naked    | LRTAARSKLRRQEGISRFYIIQVVFRNALEIGFLVGQYFLYGFSVPGLYEENRYPCIKEV   | 240 |
| gdj2b    | AMRTTTSKMRRQEGISRFYIIQVVFRNALEIGFLVGQYFLYGFNVPAPVECDRYPCKIDV   | 223 |
| xenopus  | SIRTTSKMRRQEGISRFYIIQVVFRNALEIGFLVGQYFLYGFNVPSPMYECDRYPCKIEV   | 223 |
| chicken  | AIRTTTSKMRRQEGISRFYIIQVVFRNALEIGFLVGQYFLYGFNVPSPMYECDRYPCKIEV  | 223 |

**S-site homology region**

|                                                      |                                                                |     |
|------------------------------------------------------|----------------------------------------------------------------|-----|
| gjdl                                                 | ECYVSRPTEKTVFLVFMFAVSGICVVLNLAELNHLGWRKI KTAIRGVQARRKSICEIRK   | 277 |
| rabbit                                               | ECYVSRPTEKTVFLVFMFAVSGICVVLNLAELNHLGWRKI KLAVRGAQAQRKRSVYEIRNK | 300 |
| dog                                                  | ECYVSRPTEKTVFLVFMFAVSGICVVLNLAELNHLGWRKI KLAVRGAQAQRKRSVYEIRNK | 293 |
| mouse                                                | ECYVSRPTEKTVFLVFMFAVSGICVVLNLAELNHLGWRKI KLAVRGAQAQRKRSVYEIRNK | 300 |
| rat                                                  | ECYVSRPTEKTVFLVFMFAVSGICVVLNLAELNHLGWRKI KLAVRGAQAQRKRSVYEIRNK | 300 |
| human                                                | ECYVSRPTEKTVFLVFMFAVSGICVVLNLAELNHLGWRKI KLAVRGAQAQRKRSIYEIRNK | 300 |
| macaque                                              | ECYVSRPTEKTVFLVFMFAVSGICVVLNLAELNHLGWRKI KLAVRGAQAQRKRSIYEIRNK | 300 |
| marmoset                                             | ECYVSRPTEKTVFLVFMFAVSGICVVLNLAELNHLGWRKI KLAVRGAQAQRKRSIYEIRNK | 300 |
| cat                                                  | ECYVSRPTEKTVFLVFMFAVSGICVVLNLAELNHLGWRKI KLAVRGAQAQRKRSVYEIRNK | 300 |
| pig                                                  | ECYVSRPTEKTVFLVFMFAVSGICVVLNLAELNHLGWRKI KLAVRGAQAQRKRSVYEIRNK | 300 |
| guinea                                               | ECYVSRPTEKTVFLVFMFAVSGICVVLNLAELNHLGWRKI KLAVRGAQAQRKRSVYEIRNK | 300 |
| naked                                                | ECYVSRPTEKTVFLVFMFAVSGICVVLNLAELNHLGWRKI KLAVRGAQAQRKRSVYEIRNK | 300 |
| gd2b                                                 | ECYVSRPTEKTVFLVFMFAVSGICVVLNLAELNHLGWRKI KTAVRGVQARRKSIYEIRNK  | 283 |
| xenopus                                              | ECYVSRPTEKTVFLVFMFAVSGLCVVLNLAELNHLGWRKI KMAVRGVQAKRKSIYEIRNK  | 283 |
| chicken                                              | ECYVSRPTEKTVFLVFMFAVSGICVVLNLAELNHLGWRKI KMAVRGVQAKRKSIYEIRNK  | 283 |
| *****.*****.*****.*****.*****.*****.***.*****.****.* |                                                                |     |

|          |                        |     |
|----------|------------------------|-----|
| gjd1a    | DVSHLSSVPNLGRTQSSESAYV | 299 |
| rabbit   | DLPRV-SVPNFGRTQSSDSAYV | 321 |
| dog      | DLPRV-SVPNFGRT-----    | 306 |
| mouse    | DLPRV-SVPNFGRTQSSDSAYV | 321 |
| rat      | DLPRV-SVPNFGRTQSSDSAYV | 321 |
| human    | DLPRV-SVPNFGRTQSSDSAYV | 321 |
| macaque  | DLPRV-SVPNFGRTQSSDSAYV | 321 |
| marmoset | DLPRV-SVPNFGRTQSSDSAYV | 321 |
| cat      | DLPRV-SVPNFGRTQSSDSAYV | 321 |
| pig      | DLPRV-SVPNFGRTQSSDSAYV | 321 |
| guinea   | DLPRV-SVPNFGRTQSSDSAYV | 321 |
| naked    | DLPRV-SVPNFGRTQSSDSAYV | 321 |
| gjd2b    | DLPRM-SMPNFGRTQSSDSAYV | 304 |
| xenopus  | DLPRM-GVPNFGRTQSSDSAYV | 304 |
| chicken  | DLPRM-SMPNFGRTQSSDSAYV | 304 |
|          | *: :: .:***:***        |     |

Protein sequences were retrieved from the NCBI Protein Database. Human (NP\_065711.1), Mouse NP\_034420.2; Rat NP\_062154.1, Macaque XP\_001087723.1, Marmoset JAB32260.1 Xenopus XP\_002932880, Chicken NP\_989913, Dog XP\_038297692.1, Pig XP\_020953959.1, Guinea pig XP\_003475711, Naked mole (rat) XP\_004861563.1, gjd2b/Cx35.1/Cx35b NP\_919401.1, gjd1a/Cx34.1 NP\_001122238.

**Supplementary Table S1:** *Cx36 mRNA expression during early development of the mouse brain*

| Structure                                     | Stage         | Assay Type | Reference |
|-----------------------------------------------|---------------|------------|-----------|
| brain                                         | E14, E16, E18 | NB         | [1]       |
| future brain                                  | E7.5          | RT-PCR     | [2]       |
| optic cup                                     | E8.5          | ISH        | [2]       |
| optic stalk                                   | E8.5          | ISH        | [2]       |
| forebrain                                     | E10.5         | ISH        | [2]       |
| midbrain                                      | E10.5         | ISH        | [2]       |
| thalamus                                      | E12.5         | ISH        | [2]       |
| telencephalon                                 | E12.5         | ISH        | [2]       |
| midbrain-hindbrain junction                   | E12.5         | ISH        | [2]       |
| spinal cord                                   | E12.5         | ISH        | [2]       |
| spinal ganglion                               | E12.5         | ISH        | [2]       |
| midbrain roof plate                           | E13.5         | ISH        | [2]       |
| diencephalon                                  | E13.5         | ISH        | [2]       |
| main olfactory bulb                           | E13.5         | ISH        | [2]       |
| cerebellum                                    | E13.5         | ISH        | [2]       |
| diencephalon lateral wall mantle layer        | E14.5         | ISH        | [3]       |
| olfactory cortex marginal layer               | E14.5         | ISH        | [3]       |
| telencephalon mantle layer                    | E14.5         | ISH        | [3]       |
| metencephalon rest of alar plate mantle layer | E14.5         | ISH        | [3]       |
| pons mantle layer                             | E14.5         | ISH        | [3]       |
| ventral grey horn                             | E14.5         | ISH        | [3]       |
| intermediate grey horn                        | E14.5         | ISH        | [3]       |
| cervical ganglion                             | E14.5         | ISH        | [3]       |
| cervico-thoracic ganglion                     | E14.5         | ISH        | [3]       |
| thoracic ganglion                             | E14.5         | ISH        | [3]       |
| spinal cord                                   | E17.5         | ISH        | [2]       |

**References:**

1. Sohl, G., et al., *The murine gap junction gene connexin36 is highly expressed in mouse retina and regulated during brain development*. FEBS Lett, 1998. **428**(1-2): p. 27-31.
2. Gulisano, M., et al., *Cx36 is dynamically expressed during early development of mouse brain and nervous system*. Neuroreport, 2000. **11**(17): p. 3823-8.
3. Diez-Roux, G., et al., *A high-resolution anatomical atlas of the transcriptome in the mouse embryo*. PLoS Biol, 2011. **9**(1): p. e1000582.

**Supplementary Table S2: Cx36 mRNA and protein expression in the adult rodent nervous system**

| <b>Tissue</b> | <b>Subdivision</b>                                                 | <b>RNA</b>                                                                                                                                                                      | <b>Protein</b>                                                                                                                                                                                              | <b>reference</b>    |
|---------------|--------------------------------------------------------------------|---------------------------------------------------------------------------------------------------------------------------------------------------------------------------------|-------------------------------------------------------------------------------------------------------------------------------------------------------------------------------------------------------------|---------------------|
| Telencephalon | cortex                                                             | high density labelling in layers IV, V and VI                                                                                                                                   | pyramidal neurons, GABAergic interneurons<br>PV positive interneurons                                                                                                                                       | [1]<br>[2] [3-5]    |
|               | olfactory system including olfactory epithelium, accessory systems | mitral cell layer, glomerular layer, external plexiform layer, periglomerular cells, tufted cells, granular cell layer, olfactory epithelial layer                              | olfactory nerve bundles underlying the olfactory epithelium, olfactory nerve layer, glomerular layer of the olfactory bulb, accessory olfactory bulb, vomeronasal nerve, gap junctions between mitral cells | [1] [2, 6-9]        |
|               | hippocampus                                                        | all regions of the hippocampal formation, including the enthorinal cortex                                                                                                       | CA3/4, mossy fiber terminals                                                                                                                                                                                | [1, 2, 6, 7, 10-12] |
|               | amygdala                                                           | medial amygdaloid nucleus, the anterior and posteromedial cortical amygdaloid nucleus, the amygdalo-hippocampal transition area, medial and lateral part of the central nucleus | basomedial nuclei<br>basolateral nuclei                                                                                                                                                                     | [7, 13]             |
|               | basal ganglia                                                      | caudate putamen, globus pallidus and nucleus accumbens labeling was localized in a subpopulation of scattered cells with large pale nuclei.                                     |                                                                                                                                                                                                             | [1, 14]             |
| Diencephalon  | thalamus                                                           | all major nuclei, reticular thalamic nucleus, including subthalamic nucleus                                                                                                     | reticular thalamic nucleus                                                                                                                                                                                  | [13, 15]            |
|               | hypothalamus                                                       | lateral and anterior arcuate nucleus                                                                                                                                            |                                                                                                                                                                                                             | [15] [7]            |

|           |                                |                                                                                                                                                                                                                                                                                                   |                                                                               |                           |
|-----------|--------------------------------|---------------------------------------------------------------------------------------------------------------------------------------------------------------------------------------------------------------------------------------------------------------------------------------------------|-------------------------------------------------------------------------------|---------------------------|
|           | other midbrain structures      | nuclei of the preoptic region, of the anterior region of the paraventricular nucleus, anterior hypothalamic nucleus, lateral hypothalamic area, supraoptic nucleus, of the tuberal region such as arcuate nucleus, ventromedial and dorsomedial nucleus, perifornical nucleus. Mammillary region. |                                                                               | [7, 15]                   |
|           | habenular nuclei, pineal gland | medial habenular nucleus, scattered in the lateral nucleus. intense signal in the pineal gland                                                                                                                                                                                                    | tryptophan hydroxylase-positive and 5-hydroxytryptamine-positive pinealocytes | [1, 6, 16]                |
|           | pituitary gland                | no data                                                                                                                                                                                                                                                                                           | anterior pituitary gland                                                      | [1, 17]                   |
|           | retina                         | ganglion cell layer and in the inner border of the inner nuclear layer                                                                                                                                                                                                                            | All amacrine cells; ganglion cells, bipolar cells, photoreceptor              | [1] [2, 6, 18-24] [25-28] |
| Hindbrain | cerebellum                     | molecular layer, granular layer, deep nuclei                                                                                                                                                                                                                                                      | molecular layer<br>Purkinje neurons                                           | [29]<br>[1, 2, 6]         |
|           | inferior olive                 | all olivary neurons                                                                                                                                                                                                                                                                               | all olivary neurons                                                           | [1] [2, 6, 18, 22]        |
|           | pons                           | raphe, trochlear, reticulocemental motor trigeminal basilar pontine                                                                                                                                                                                                                               | trigeminal ganglion                                                           | [30]                      |
|           | medulla                        | most nuclei such as the red, parabrachial and oculomotor nuclei, the periaqueductal grey and the superior and inferior colliculi                                                                                                                                                                  | lacZ transgenic                                                               | [31]                      |

|             |                                           |                                                                                                                                |                                                                        |          |
|-------------|-------------------------------------------|--------------------------------------------------------------------------------------------------------------------------------|------------------------------------------------------------------------|----------|
| Spinal cord | spinal cord                               | all the lamina of the gray matter of the spinal cord, with the highest grain density in the motor neurons of the anterior horn | detected in the IML, IC and CA and in laminae VIII and IX ventral horn | [18]     |
|             | ganglions                                 | dorsal root ganglia                                                                                                            | dorsal root ganglia lumbar dorsal root; trigeminal sensory ganglia     | [32, 33] |
| Other       | neural crest-derived neuroendocrine organ | carotid body                                                                                                                   | carotid body                                                           | [34]     |
|             | neural crest-derived neuroendocrine organ | myenteric plexus                                                                                                               | myenteric plexus                                                       | [34]     |

## References

1. Belluardo, N., et al., *Expression of connexin36 in the adult and developing rat brain*. Brain Res, 2000. **865**(1): p. 121-38.
2. Teubner, B., et al., *Functional expression of the murine connexin 36 gene coding for a neuron-specific gap junctional protein*. J Membr Biol, 2000. **176**(3): p. 249-62.
3. Meier, C., et al., *Immunohistochemical detection of the neuronal connexin36 in the mouse central nervous system in comparison to connexin36-deficient tissues*. Histochem Cell Biol, 2002. **117**(6): p. 461-71.
4. Ma, Y., et al., *Expression of gap junction protein connexin36 in multiple subtypes of GABAergic neurons in adult rat somatosensory cortex*. Cereb Cortex, 2011. **21**(11): p. 2639-49.
5. Priest, C.A., A.J. Thompson, and A. Keller, *Gap junction proteins in inhibitory neurons of the adult barrel neocortex*. Somatosens Mot Res, 2001. **18**(4): p. 245-52.
6. Condorelli, D.F., et al., *Cloning of a new gap junction gene (Cx36) highly expressed in mammalian brain neurons*. Eur J Neurosci, 1998. **10**(3): p. 1202-8.
7. Parenti, R., et al., *Expression of connexin36 mRNA in adult rodent brain*. Neuroreport, 2000. **11**(7): p. 1497-502.
8. Zhang, C. and D. Restrepo, *Heterogeneous expression of connexin 36 in the olfactory epithelium and glomerular layer of the olfactory bulb*. J Comp Neurol, 2003. **459**(4): p. 426-39.
9. Christie, J.M., et al., *Connexin36 mediates spike synchrony in olfactory bulb glomeruli*. Neuron, 2005. **46**(5): p. 761-72.



10. Nagy, J.I., *Evidence for connexin36 localization at hippocampal mossy fiber terminals suggesting mixed chemical/electrical transmission by granule cells.* Brain Res, 2012. **1487**: p. 107-22.
11. Hamzei-Sichani, F., et al., *Mixed Electrical-Chemical Synapses in Adult Rat Hippocampus are Primarily Glutamatergic and Coupled by Connexin-36.* Front Neuroanat, 2012. **6**: p. 13.
12. Condorelli, D.F., et al., *Cellular expression of connexins in the rat brain: neuronal localization, effects of kainate-induced seizures and expression in apoptotic neuronal cells.* Eur J Neurosci, 2003. **18**(7): p. 1807-27.
13. Rash, J.E., et al., *High-resolution proteomic mapping in the vertebrate central nervous system: close proximity of connexin35 to NMDA glutamate receptor clusters and co-localization of connexin36 with immunoreactivity for zonula occludens protein-1 (ZO-1).* J Neurocytol, 2004. **33**(1): p. 131-51.
14. Venance, L., J. Glowinski, and C. Giaume, *Electrical and chemical transmission between striatal GABAergic output neurones in rat brain slices.* J Physiol, 2004. **559**(Pt 1): p. 215-30.
15. Lassen, M.B., et al., *Brain stimulation reward is integrated by a network of electrically coupled GABA neurons.* Brain Res, 2007. **1156**: p. 46-58.
16. Wang, S.G., et al., *Connexin36 localization to pinealocytes in the pineal gland of mouse and rat.* Eur J Neurosci, 2017. **45**(12): p. 1594-1605.
17. Gongrich, C., et al., *Electrotonic Coupling in the Pituitary Supports the Hypothalamic-Pituitary-Gonadal Axis in a Sex Specific Manner.* Front Mol Neurosci, 2016. **9**: p. 65.
18. Rash, J.E., et al., *Immunogold evidence that neuronal gap junctions in adult rat brain and spinal cord contain connexin-36 but not connexin-32 or connexin-43.* Proc Natl Acad Sci U S A, 2000. **97**(13): p. 7573-8.
19. Al-Ubaidi, M.R., et al., *Functional properties, developmental regulation, and chromosomal localization of murine connexin36, a gap-junctional protein expressed preferentially in retina and brain.* J Neurosci Res, 2000. **59**(6): p. 813-26.
20. Guldenagel, M., et al., *Visual transmission deficits in mice with targeted disruption of the gap junction gene connexin36.* J Neurosci, 2001. **21**(16): p. 6036-44.
21. Hidaka, S., T. Kato, and E. Miyachi, *Expression of gap junction connexin36 in adult rat retinal ganglion cells.* J Integr Neurosci, 2002. **1**(1): p. 3-22.
22. Meier, C., et al., *Immunohistochemical detection of the neuronal connexin36 in the mouse central nervous system in comparison to connexin36-deficient tissues.* Histochemistry and Cell Biology, 2002. **117**(6): p. 461-471.
23. Feigenspan, A., et al., *Expression of connexin36 in cone pedicles and OFF-cone bipolar cells of the mouse retina.* J Neurosci, 2004. **24**(13): p. 3325-34.
24. Dedek, K., et al., *Localization of heterotypic gap junctions composed of connexin45 and connexin36 in the rod pathway of the mouse retina.* Eur J Neurosci, 2006. **24**(6): p. 1675-86.

25. Han, Y. and S.C. Massey, *Electrical synapses in retinal ON cone bipolar cells: subtype-specific expression of connexins*. Proc Natl Acad Sci U S A, 2005. **102**(37): p. 13313-8.
26. Volgyi, B., et al., *Morphology and tracer coupling pattern of alpha ganglion cells in the mouse retina*. J Comp Neurol, 2005. **492**(1): p. 66-77.
27. Li, H., et al., *Adenosine and dopamine receptors coregulate photoreceptor coupling via gap junction phosphorylation in mouse retina*. J Neurosci, 2013. **33**(7): p. 3135-50.
28. Kantor, O., et al., *Characterization of connexin36 gap junctions in the human outer retina*. Brain Struct Funct, 2016. **221**(6): p. 2963-84.
29. Nagy, J.I. and J.E. Rash, *Cx36, Cx43 and Cx45 in mouse and rat cerebellar cortex: species-specific expression, compensation in Cx36 null mice and co-localization in neurons vs. glia*. Eur J Neurosci, 2017. **46**(2): p. 1790-1804.
30. Garrett, F.G. and P.L. Durham, *Differential expression of connexins in trigeminal ganglion neurons and satellite glial cells in response to chronic or acute joint inflammation*. Neuron Glia Biol, 2008. **4**(4): p. 295-306.
31. Degen, J., et al., *Expression pattern of lacZ reporter gene representing connexin36 in transgenic mice*. J Comp Neurol, 2004. **473**(4): p. 511-25.
32. Perez Armendariz, E.M., et al., *Neurons and satellite glial cells in adult rat lumbar dorsal root ganglia express connexin 36*. Acta Histochem, 2018. **120**(3): p. 168-178.
33. Nagy, J.I., et al., *Connexin36 Expression in Primary Afferent Neurons in Relation to the Axon Reflex and Modality Coding of Somatic Sensation*. Neuroscience, 2018. **383**: p. 216-234.
34. Frinchi, M., et al., *Connexin36 (Cx36) expression and protein detection in the mouse carotid body and myenteric plexus*. Acta Histochem, 2013. **115**(3): p. 252-6.
